# Supplementary material
Source: HighWire-hosted journal article supplement (https://bmjopen.bmj.com/content/12/9/e059572)
Supplement: inline-supplementary-material-1 [file inline-supplementary-material-1.pdf]

Table S1. Odds ratios and 95% confidence intervals from longitudinal random-intercept logistic regression models assessing the relationship between psychosocial job quality and any sickness absence.

|                                               | <b>Model 1</b><br>(adjusted for time only) | <b>Model 2</b><br>(within- and between-person terms) | <b>Model 3</b><br>(adding socio-demographic covariates, childhood adversity and non-work events) | <b>Model 4</b><br>(adding health covariates) | <b>Model 5</b><br>(adding depression/anxiety) | <b>Model 6</b><br>(adding neuroticism) |
|-----------------------------------------------|--------------------------------------------|------------------------------------------------------|--------------------------------------------------------------------------------------------------|----------------------------------------------|-----------------------------------------------|----------------------------------------|
| Original job quality score (0-3) <sup>a</sup> | 1.27 (1.17–1.37)***                        |                                                      |                                                                                                  |                                              |                                               |                                        |
| Job quality deviation score                   |                                            | 1.20 (1.08–1.33)**                                   | 1.18 (1.06–1.31)**                                                                               | 1.18 (1.06–1.32)**                           | 1.14 (1.02–1.26)**                            | 1.14 (1.02–1.27)**                     |
| Average job quality across waves              |                                            | 1.37 (1.21–1.56)***                                  | 1.24 (1.09–1.42)**                                                                               | 1.24 (1.09–1.41)**                           | 1.08 (0.95–1.23)                              | 1.05 (0.91–1.19)                       |
| Sex                                           |                                            |                                                      |                                                                                                  |                                              |                                               |                                        |
| Male (ref.)                                   |                                            |                                                      | 1.00                                                                                             | 1.00                                         | 1.00                                          | 1.00                                   |
| Female                                        |                                            |                                                      | 1.36 (1.17–1.59)***                                                                              | 1.32 (1.13–1.55)**                           | 1.30 (1.12–1.52)**                            | 1.28 (1.10–1.50)                       |
| Partner                                       |                                            |                                                      |                                                                                                  |                                              |                                               |                                        |
| Having a partner                              |                                            |                                                      | 1.00                                                                                             | 1.00                                         | 1.00                                          | 1.00                                   |
| No partner (ref.)                             |                                            |                                                      | 1.41 (1.19–1.67)***                                                                              | 1.41 (1.18–1.67)***                          | 1.38 (1.17–1.64)***                           | 1.37 (1.16–1.63)                       |
| Education completion                          |                                            |                                                      |                                                                                                  |                                              |                                               |                                        |
| Incomplete high school (ref.)                 |                                            |                                                      | 1.00                                                                                             | 1.00                                         | 1.00                                          | 1.00                                   |
| Completion of high school                     |                                            |                                                      | 1.00 (0.82–1.22)                                                                                 | 0.99 (0.81–1.21)                             | 1.00 (0.82–1.22)                              | 1.00 (0.82–1.22)                       |
| Completion of tertiary study                  |                                            |                                                      | 0.97 (0.78–1.20)                                                                                 | 0.98 (0.79–1.22)                             | 1.03 (0.83–1.27)                              | 1.02 (0.83–1.27)                       |
| Occupational skill level                      |                                            |                                                      |                                                                                                  |                                              |                                               |                                        |
| High (ref.)                                   |                                            |                                                      | 1.00                                                                                             | 1.00                                         | 1.00                                          | 1.00                                   |
| Medium                                        |                                            |                                                      | 1.03 (0.86–1.22)                                                                                 | 1.03 (0.87–1.23)                             | 1.03 (0.87–1.22)                              | 1.02 (0.86–1.22)                       |
| Low                                           |                                            |                                                      | 0.87 (0.71–1.08)                                                                                 | 0.87 (0.71–1.08)                             | 0.91 (0.73–1.12)                              | 0.90 (0.73–1.11)                       |
| Parental responsibilities                     |                                            |                                                      |                                                                                                  |                                              |                                               |                                        |
| No (ref.)                                     |                                            |                                                      | 1.00                                                                                             | 1.00                                         | 1.00                                          | 1.00                                   |
| Yes                                           |                                            |                                                      | 1.06 (0.90–1.24)                                                                                 | 1.07 (0.91–1.25)                             | 1.06 (0.91–1.25)                              | 1.06 (0.91–1.24)                       |
| Financial hardship                            |                                            |                                                      |                                                                                                  |                                              |                                               |                                        |
| No (ref.)                                     |                                            |                                                      | 1.00                                                                                             | 1.00                                         | 1.00                                          | 1.00                                   |
| Yes                                           |                                            |                                                      | 1.28 (1.07–1.53)**                                                                               | 1.26 (1.05–1.51)**                           | 1.17 (0.98–1.41)                              | 1.17 (0.97–1.40)                       |
| Childhood adversity (wave 1)                  |                                            |                                                      |                                                                                                  |                                              |                                               |                                        |
| No (ref.)                                     |                                            |                                                      | 1.00                                                                                             | 1.00                                         | 1.00                                          | 1.00                                   |
| Yes                                           |                                            |                                                      | 1.41 (1.20–1.65)***                                                                              | 1.40 (1.19–1.64)***                          | 1.31 (1.12–1.54)**                            | 1.29 (1.10–1.52)*                      |
| Adverse non-work life events                  |                                            |                                                      |                                                                                                  |                                              |                                               |                                        |

|                                                     |                  |                  |                     |                     |                     |                     |
|-----------------------------------------------------|------------------|------------------|---------------------|---------------------|---------------------|---------------------|
| 0 (ref.)                                            |                  |                  | 1.00                | 1.00                | 1.00                | 1.00                |
| 1                                                   |                  |                  | 1.11 (0.96–1.28)    | 1.09 (0.94–1.26)    | 1.06 (0.91–1.23)    | 1.05 (0.91–1.24)    |
| ≥2                                                  |                  |                  | 1.63 (1.36–1.96)*** | 1.60 (1.34–1.93)*** | 1.49 (1.24–1.79)*** | 1.48 (1.23–1.78)*** |
| <b>Smoking status</b>                               |                  |                  |                     |                     |                     |                     |
| Never/past smoker (ref.)                            |                  |                  |                     | 1.00                | 1.00                | 1.00                |
| Current smoker                                      |                  |                  |                     | 0.97 (0.79–1.20)    | 0.94 (0.76–1.15)    | 0.94 (0.76–1.15)    |
| <b>Alcohol consumption</b>                          |                  |                  |                     |                     |                     |                     |
| No (ref.)                                           |                  |                  |                     | 1.00                | 1.00                | 1.00                |
| Yes                                                 |                  |                  |                     | 0.94 (0.72–1.22)    | 0.92 (0.71–1.20)    | 0.92 (0.71–1.19)    |
| <b>Moderate/vigorous physical exercise</b>          |                  |                  |                     |                     |                     |                     |
| 0 (ref.)                                            |                  |                  |                     | 1.00                | 1.00                | 1.00                |
| <1-5                                                |                  |                  |                     | 1.08 (0.87–1.32)    | 1.09 (0.88–1.34)    | 1.10 (0.90–1.36)    |
| 1-5-3-0                                             |                  |                  |                     | 1.19 (0.96–1.49)    | 1.20 (0.97–1.50)    | 1.22 (0.98–1.52)    |
| 3-1-5-5                                             |                  |                  |                     | 0.94 (0.76–1.15)    | 0.97 (0.79–1.20)    | 0.98 (0.80–1.21)    |
| >5-5                                                |                  |                  |                     | 0.83 (0.66–1.03)    | 0.87 (0.70–1.09)    | 0.89 (0.71–1.10)    |
| <b>Number of chronic physical health conditions</b> |                  |                  |                     |                     |                     |                     |
| 0 (ref.)                                            |                  |                  |                     | 1.00                | 1.00                | 1.00                |
| 1                                                   |                  |                  |                     | 1.00 (0.86–1.16)    | 0.98 (0.84–1.14)    | 0.98 (0.84–1.14)    |
| ≥ 2                                                 |                  |                  |                     | 1.48 (1.22–1.79)*** | 1.42 (1.17–1.72)*** | 1.41 (1.16–1.71)*** |
| <b>Depression/anxiety</b>                           |                  |                  |                     |                     |                     |                     |
| No (ref.)                                           |                  |                  |                     |                     | 1.00                | 1.00                |
| Yes                                                 |                  |                  |                     |                     | 2.19 (1.87–2.56)*** | 2.06 (1.75–2.43)*** |
| <b>Neuroticism</b>                                  |                  |                  |                     |                     |                     |                     |
| 0 (Low) (ref.)                                      |                  |                  |                     |                     |                     | 1.00                |
| 1                                                   |                  |                  |                     |                     |                     | 1.13 (0.87–1.46)    |
| 2                                                   |                  |                  |                     |                     |                     | 1.13 (0.82–1.54)    |
| 3                                                   |                  |                  |                     |                     |                     | 1.13 (0.87–1.47)    |
| 4 (High)                                            |                  |                  |                     |                     |                     | 1.41 (1.06–1.87)**  |
| <b>Survey wave</b>                                  |                  |                  |                     |                     |                     |                     |
| 1 (ref.)                                            | 1.00             | 1.00             | 1.00                | 1.00                | 1.00                | 1.00                |
| 2                                                   | 0.89 (0.75–1.04) | 0.88 (0.75–1.03) | 0.89 (0.75–1.05)    | 0.87 (0.74–1.03)    | 0.90 (0.76–1.06)    | 0.90 (0.76–1.06)    |
| 3                                                   | 1.10 (0.94–1.29) | 1.09 (0.93–1.28) | 1.08 (0.91–1.29)    | 1.05 (0.88–1.25)    | 1.07 (0.90–1.28)    | 1.07 (0.89–1.27)    |
| 4                                                   | 0.84 (0.70–1.01) | 0.84 (0.70–1.00) | 0.88 (0.72–1.08)    | 0.81 (0.66–1.01)    | 0.84 (0.68–1.05)    | 0.84 (0.68–1.04)    |

\*p<0.05; \*\*p<0.01; \*\*\*p<0.001. a – number of psychosocial job adversities.

Table S2. Odds ratios and 95% confidence intervals from longitudinal random-intercept logistic regression models assessing the relationship between psychosocial job quality and longer sickness absence ( $\geq 5$  days).

|                                               | <b>Model 1</b><br>(adjusted for time only) | <b>Model 2</b><br>(within- and between-person terms) | <b>Model 3</b><br>(adding socio-demographic covariates, childhood adversity and non-work events) | <b>Model 4</b><br>(adding health covariates) | <b>Model 5</b><br>(adding depression/anxiety) | <b>Model 6</b><br>(adding neuroticism) |
|-----------------------------------------------|--------------------------------------------|------------------------------------------------------|--------------------------------------------------------------------------------------------------|----------------------------------------------|-----------------------------------------------|----------------------------------------|
| Original job quality score (0-3) <sup>a</sup> | 1.53 (1.34–1.76)***                        |                                                      |                                                                                                  |                                              |                                               |                                        |
| Job quality deviation score                   |                                            | 1.47 (1.22–1.79)***                                  | 1.40 (1.15–1.70)***                                                                              | 1.39 (1.14–1.69)***                          | 1.33 (1.09–1.62)**                            | 1.33 (1.09–1.62)**                     |
| Average job quality across waves              |                                            | 1.60 (1.31–1.94)***                                  | 1.37 (1.12–1.67)***                                                                              | 1.36 (1.12–1.66)**                           | 1.17 (0.96–1.43)                              | 1.18 (0.96–1.45)                       |
| Sex                                           |                                            |                                                      |                                                                                                  |                                              |                                               |                                        |
| Male (ref.)                                   |                                            |                                                      | 1.00                                                                                             | 1.00                                         | 1.00                                          | 1.00                                   |
| Female                                        |                                            |                                                      | 1.06 (.83–1.36)                                                                                  | 1.04 (0.81–1.33)                             | 1.02 (0.79–1.30)                              | 1.02 (0.80–1.32)                       |
| Partner                                       |                                            |                                                      |                                                                                                  |                                              |                                               |                                        |
| Having a partner                              |                                            |                                                      | 1.00                                                                                             | 1.00                                         | 1.00                                          | 1.00                                   |
| No partner (ref.)                             |                                            |                                                      | 1.24 (.94–1.64)                                                                                  | 1.22 (.92–1.61)                              | 1.21 (0.79–1.30)                              | 1.21 (0.91–1.59)                       |
| Education completion                          |                                            |                                                      |                                                                                                  |                                              |                                               |                                        |
| Incomplete high school (ref.)                 |                                            |                                                      | 1.00                                                                                             | 1.00                                         | 1.00                                          | 1.00                                   |
| Completion of high school                     |                                            |                                                      | 0.80 (0.59–1.09)                                                                                 | 0.82 (0.61–1.11)                             | 0.82 (0.60–1.11)                              | 0.83 (0.61–1.13)                       |
| Completion of tertiary study                  |                                            |                                                      | 0.73 (0.52–1.02)                                                                                 | 0.78 (0.56–1.10)                             | 0.81 (0.58–1.14)                              | 0.83 (0.59–1.18)                       |
| Occupational skill level                      |                                            |                                                      |                                                                                                  |                                              |                                               |                                        |
| High (ref.)                                   |                                            |                                                      | 1.00                                                                                             | 1.00                                         | 1.00                                          | 1.00                                   |
| Medium                                        |                                            |                                                      | 1.10 (0.81–1.48)                                                                                 | 1.08 (0.80–1.46)                             | 1.07 (0.80–1.45)                              | 1.09 (0.92–1.59)                       |
| Low                                           |                                            |                                                      | 1.02 (0.72–1.45)                                                                                 | 0.97 (0.69–1.38)                             | 1.00 (0.70–1.42)                              | 1.02 (0.71–1.45)                       |
| Parental responsibilities                     |                                            |                                                      |                                                                                                  |                                              |                                               |                                        |
| No (ref.)                                     |                                            |                                                      | 1.00                                                                                             | 1.00                                         | 1.00                                          | 1.00                                   |
| Yes                                           |                                            |                                                      | 1.17 (0.89–1.55)                                                                                 | 1.20 (0.91–1.58)                             | 1.21 (0.92–1.60)                              | 1.21 (0.92–1.59)                       |
| Financial hardship                            |                                            |                                                      |                                                                                                  |                                              |                                               |                                        |
| No (ref.)                                     |                                            |                                                      | 1.00                                                                                             | 1.00                                         | 1.00                                          | 1.00                                   |
| Yes                                           |                                            |                                                      | 1.57 (1.19–2.08)***                                                                              | 1.51 (1.14–1.99)**                           | 1.37 (1.03–1.82)*                             | 1.38 (1.04–1.83)*                      |
| Childhood adversity (wave 1)                  |                                            |                                                      |                                                                                                  |                                              |                                               |                                        |
| No (ref.)                                     |                                            |                                                      | 1.00                                                                                             | 1.00                                         | 1.00                                          | 1.00                                   |
| Yes                                           |                                            |                                                      | 1.57 (1.23–2.01)***                                                                              | 1.56 (1.22–1.99)***                          | 1.46 (1.14–1.87)**                            | 1.46 (1.14–1.86)**                     |
| Adverse non-work life events                  |                                            |                                                      |                                                                                                  |                                              |                                               |                                        |

|                                                     |                  |                  |                     |                     |                     |                     |
|-----------------------------------------------------|------------------|------------------|---------------------|---------------------|---------------------|---------------------|
| 0 (ref.)                                            |                  |                  | 1.00                | 1.00                | 1.00                | 1.00                |
| 1                                                   |                  |                  | 1.62 (1.23–2.13)*** | 1.58 (1.20–2.07)**  | 1.53 (1.16–2.01)**  | 1.53 (1.16–2.01)**  |
| ≥2                                                  |                  |                  | 2.51 (1.86–3.39)*** | 2.44 (1.80–3.30)*** | 2.23 (1.64–3.02)*** | 2.24 (1.65–3.04)*** |
| <b>Smoking status</b>                               |                  |                  |                     |                     |                     |                     |
| Never/past smoker (ref.)                            |                  |                  |                     | 1.00                | 1.00                | 1.00                |
| Current smoker                                      |                  |                  |                     | 1.17 (0.85–1.61)    | 1.14 (0.83–1.57)    | 1.15 (0.84–1.58)    |
| <b>Alcohol consumption</b>                          |                  |                  |                     |                     |                     |                     |
| No (ref.)                                           |                  |                  |                     | 1.00                | 1.00                | 1.00                |
| Yes                                                 |                  |                  |                     | 1.22 (0.81–1.85)    | 1.21 (0.80–1.83)    | 1.20 (0.79–1.82)    |
| <b>Moderate/vigorous physical exercise</b>          |                  |                  |                     |                     |                     |                     |
| 0 (ref.)                                            |                  |                  |                     | 1.00                | 1.00                | 1.00                |
| <1.5                                                |                  |                  |                     | 0.96 (0.67–1.36)    | 0.97 (0.68–1.38)    | 0.97 (0.68–1.38)    |
| 1.5–3.0                                             |                  |                  |                     | 0.84 (0.57–1.24)    | 0.84 (0.57–1.24)    | 0.83 (0.56–1.23)    |
| 3.1–5.5                                             |                  |                  |                     | 0.79 (0.56–1.14)    | 0.83 (0.58–1.19)    | 0.83 (0.58–1.19)    |
| >5.5                                                |                  |                  |                     | 0.81 (0.56–1.17)    | 0.86 (0.59–1.25)    | 0.85 (0.59–1.24)    |
| <b>Number of chronic physical health conditions</b> |                  |                  |                     |                     |                     |                     |
| 0 (ref.)                                            |                  |                  |                     | 1.00                | 1.00                | 1.00                |
| 1                                                   |                  |                  |                     | 1.04 (0.79–1.36)    | 1.01 (0.77–1.33)    | 1.01 (0.76–1.32)    |
| ≥ 2                                                 |                  |                  |                     | 1.37 (1.00–1.87)*   | 1.29 (0.94–1.77)    | 1.28 (0.93–1.76)    |
| <b>Depression/anxiety</b>                           |                  |                  |                     |                     |                     |                     |
| No (ref.)                                           |                  |                  |                     |                     | 1.00                | 1.00                |
| Yes                                                 |                  |                  |                     |                     | 2.21 (1.71–2.86)*** | 2.22 (1.69–2.93)*** |
| <b>Neuroticism</b>                                  |                  |                  |                     |                     |                     |                     |
| 0 (Low) (ref.)                                      |                  |                  |                     |                     |                     | 1.00                |
| 1                                                   |                  |                  |                     |                     |                     | 0.67 (0.43–1.05)    |
| 2                                                   |                  |                  |                     |                     |                     | 1.04 (0.64–1.69)    |
| 3                                                   |                  |                  |                     |                     |                     | 0.77 (0.50–1.19)    |
| 4 (High)                                            |                  |                  |                     |                     |                     | 0.81 (0.83–1.83)    |
| <b>Survey wave</b>                                  |                  |                  |                     |                     |                     |                     |
| 1 (ref.)                                            | 1.00             | 1.00             | 1.00                | 1.00                | 1.00                | 1.00                |
| 2                                                   | 0.91 (0.66–1.25) | 0.90 (0.66–1.24) | 0.94 (0.68–1.31)    | 0.93 (0.67–1.30)    | 0.97 (0.70–1.35)    | 0.97 (0.70–1.35)    |
| 3                                                   | 1.23 (0.91–1.66) | 1.22 (0.90–1.65) | 1.28 (0.92–1.77)    | 1.23 (0.88–1.71)    | 1.28 (0.92–1.78)    | 1.27 (0.91–1.77)    |
| 4                                                   | 1.06 (0.75–1.49) | 1.05 (0.75–1.48) | 1.24 (0.85–1.82)    | 1.17 (0.79–1.73)    | 1.23 (0.83–1.83)    | 1.24 (0.83–1.83)    |

\*p<0.05; \*\*p<0.01; \*\*\*p<0.001. a – number of psychosocial job adversities.

Table S3. Odds ratios and 95% confidence intervals from longitudinal random-intercept negative binomial regression models assessing the relationship between psychosocial job quality categories 0-3 and the number of days of sickness absence

|                                  | <b>Model 1</b><br>(adjusted for time only) | <b>Model 2</b><br>(within- and between-person terms) | <b>Model 3</b><br>(adding socio-demographic covariates, childhood adversity and non-work events) | <b>Model 4</b><br>(adding health covariates) | <b>Model 5</b><br>(adding depression/anxiety) | <b>Model 6</b><br>(adding neuroticism) |
|----------------------------------|--------------------------------------------|------------------------------------------------------|--------------------------------------------------------------------------------------------------|----------------------------------------------|-----------------------------------------------|----------------------------------------|
| Original job quality score       |                                            |                                                      |                                                                                                  |                                              |                                               |                                        |
| 0                                | 1.00                                       | 1.00                                                 | 1.00                                                                                             | 1.00                                         | 1.00                                          | 1.00                                   |
| 1                                | 1.14 (0.98-1.32)                           | 1.07 (0.91-1.27)                                     | 1.08 (0.92-1.27)                                                                                 | 1.08 (0.92-1.28)                             | 1.06 (0.90-1.25)                              | 1.06 (0.90-1.25)                       |
| 2                                | 1.58 (1.31-1.91)**                         | 1.42 (1.13-1.78)**                                   | 1.39 (1.20-1.75)**                                                                               | 1.39 (1.10-1.75)**                           | 1.28 (1.02-1.62)*                             | 1.29 (1.02-1.62)**                     |
| 3                                | 2.16 (1.53-3.06)**                         | 1.84 (1.23-2.74)**                                   | 1.68 (1.12-2.51)**                                                                               | 1.73 (1.15-2.59)**                           | 1.52 (1.01-2.28)*                             | 1.54 (1.02-2.31)**                     |
| Average job quality across waves |                                            | 1.15 (0.97-1.36)                                     | 1.06 (0.90-1.25)                                                                                 | 1.05 (0.89-1.24)                             | 0.95 (0.81-1.12)                              | 0.92 (0.78-1.09)                       |
| Sex                              |                                            |                                                      |                                                                                                  |                                              |                                               |                                        |
| Male (ref.)                      |                                            |                                                      | 1.00                                                                                             | 1.00                                         | 1.00                                          | 1.00                                   |
| Female                           |                                            |                                                      | 1.37 (1.17-1.59)***                                                                              | 1.32 (1.13-1.55)***                          | 1.31 (1.12-1.52)**                            | 1.28 (1.10-1.50)**                     |
| Partner                          |                                            |                                                      |                                                                                                  |                                              |                                               |                                        |
| Having a partner                 |                                            |                                                      | 1.00                                                                                             | 1.00                                         | 1.00                                          | 1.00                                   |
| No partner (ref)                 |                                            |                                                      | 1.41 (1.19-1.68)***                                                                              | 1.41 (1.19-1.67)***                          | 1.38 (1.17-1.64)***                           | 1.37 (1.16-1.63)***                    |
| Education completion             |                                            |                                                      |                                                                                                  |                                              |                                               |                                        |
| Incomplete high school (ref.)    |                                            |                                                      | 1.00                                                                                             | 1.00                                         | 1.00                                          | 1.00                                   |
| Completion of high school        |                                            |                                                      | 1.00 (0.82-1.22)                                                                                 | 0.99 (0.81-1.21)                             | 1.00 (0.82-1.22)                              | 1.00 (0.82-1.22)                       |
| Completion of tertiary study     |                                            |                                                      | 0.97 (0.79-1.21)                                                                                 | 0.99 (0.79-1.22)                             | 1.03 (0.83-1.27)                              | 1.03 (0.83-1.27)                       |
| Occupational skill level         |                                            |                                                      |                                                                                                  |                                              |                                               |                                        |
| High (ref.)                      |                                            |                                                      | 1.00                                                                                             | 1.00                                         | 1.00                                          | 1.00                                   |
| Medium                           |                                            |                                                      | 1.03 (0.87-1.22)                                                                                 | 1.03 (0.87-1.23)                             | 1.03 (0.87-1.22)                              | 1.02 (0.86-1.22)                       |
| Low                              |                                            |                                                      | 0.87 (0.72-1.45)                                                                                 | 0.87 (0.71-1.08)                             | 0.91 (0.73-1.12)                              | 0.90 (0.73-1.11)                       |
| Parental responsibilities        |                                            |                                                      |                                                                                                  |                                              |                                               |                                        |
| No (ref.)                        |                                            |                                                      | 1.00                                                                                             | 1.00                                         | 1.00                                          | 1.00                                   |
| Yes                              |                                            |                                                      | 1.06 (0.91-1.24)                                                                                 | 1.07 (0.91-1.25)                             | 1.07 (0.91-1.25)                              | 1.06 (0.91-1.24)                       |
| Financial hardship               |                                            |                                                      |                                                                                                  |                                              |                                               |                                        |
| No (ref.)                        |                                            |                                                      | 1.00                                                                                             | 1.00                                         | 1.00                                          | 1.00                                   |
| Yes                              |                                            |                                                      | 1.28 (1.06-1.53)**                                                                               | 1.26 (1.05-1.51)**                           | 1.17 (0.97-1.40)                              | 1.17 (0.97-1.40)                       |
| Childhood adversity (wave 1)     |                                            |                                                      |                                                                                                  |                                              |                                               |                                        |

|                                              |      |      |                     |                     |                     |                     |
|----------------------------------------------|------|------|---------------------|---------------------|---------------------|---------------------|
| No (ref)                                     |      |      | 1.00                | 1.00                | 1.00                | 1.00                |
| Yes                                          |      |      | 1.40 (1.19–1.65)*** | 1.39 (1.18–1.63)*** | 1.31 (1.12–1.54)**  | 1.29 (1.10–1.51)**  |
| Adverse non-work life events                 |      |      |                     |                     |                     |                     |
| 0 (ref.)                                     |      |      | 1.00                | 1.00                | 1.00                | 1.00                |
| 1                                            |      |      | 1.11 (0.96–1.28)    | 1.09 (0.94–1.26)    | 1.06 (0.91–1.23)**  | 1.05 (0.91–1.22)    |
| ≥2                                           |      |      | 1.63 (1.36–1.96)*** | 1.60 (1.34–1.92)*** | 1.49 (1.24–1.79)*** | 1.48 (1.23–1.77)*** |
| Smoking status                               |      |      |                     |                     |                     |                     |
| Never/past smoker (ref.)                     |      |      |                     | 1.00                | 1.00                | 1.00                |
| Current smoker                               |      |      |                     | 0.97 (0.79–1.19)    | 0.94 (0.76–1.15)    | 0.94 (0.76–1.15)    |
| Alcohol consumption                          |      |      |                     |                     |                     |                     |
| No (ref.)                                    |      |      |                     | 1.00                | 1.00                | 1.00                |
| Yes                                          |      |      |                     | 0.94 (0.73–1.22)    | 0.93 (0.71–1.20)    | 0.92 (0.71–1.20)    |
| Moderate/vigorous physical exercise          |      |      |                     |                     |                     |                     |
| 0 (ref.)                                     |      |      |                     | 1.00                | 1.00                | 1.00                |
| <1.5                                         |      |      |                     | 1.08 (0.88–1.33)    | 1.09 (0.89–1.34)    | 1.11 (0.90–1.36)    |
| 1.5–3.0                                      |      |      |                     | 1.19 (0.96–1.49)    | 1.20 (0.97–1.50)    | 1.22 (0.98–1.52)    |
| 3.1–5.5                                      |      |      |                     | 0.94 (0.76–1.15)    | 0.97 (0.79–1.19)    | 0.98 (0.80–1.21)    |
| >5.5                                         |      |      |                     | 0.83 (0.66–1.03)    | 0.87 (0.70–1.09)    | 0.88 (0.71–1.10)    |
| Number of chronic physical health conditions |      |      |                     |                     |                     |                     |
| 0 (ref.)                                     |      |      |                     | 1.00                | 1.00                | 1.00                |
| 1                                            |      |      |                     | 1.00 (0.86–1.16)    | 0.98 (0.84–1.14)    | 0.98 (0.84–1.14)    |
| ≥2                                           |      |      |                     | 1.48 (1.22–1.79)*** | 1.42 (1.17–1.72)*** | 1.41 (0.16–1.71)*** |
| Depression/anxiety                           |      |      |                     |                     |                     |                     |
| No (ref.)                                    |      |      |                     |                     | 1.00                | 1.00                |
| Yes                                          |      |      |                     |                     | 2.18 (1.86–2.55)*** | 2.05 (1.74–2.42)*** |
| Neuroticism                                  |      |      |                     |                     |                     |                     |
| 0 (Low) (ref.)                               |      |      |                     |                     |                     | 1.00                |
| 1                                            |      |      |                     |                     |                     | 1.13 (0.87–1.47)    |
| 2                                            |      |      |                     |                     |                     | 1.13 (0.83–1.55)    |
| 3                                            |      |      |                     |                     |                     | 1.14 (0.87–1.48)    |
| 4 (High)                                     |      |      |                     |                     |                     | 1.42 (1.07–1.88)*   |
| Survey wave                                  |      |      |                     |                     |                     |                     |
| 1 (ref)                                      | 1.00 | 1.00 | 1.00                | 1.00                | 1.00                | 1.00                |

|   |                  |                  |                  |                  |                  |                  |
|---|------------------|------------------|------------------|------------------|------------------|------------------|
| 2 | 0.89 (0.75–1.04) | 0.88 (0.75–1.03) | 0.89 (0.75–1.05) | 0.87 (0.74–1.03) | 0.90 (0.76–1.06) | 0.90 (0.76–1.06) |
| 3 | 1.10 (0.94–1.29) | 1.09 (0.93–1.28) | 1.09 (0.91–1.29) | 1.05 (0.88–1.25) | 1.07 (0.90–1.28) | 1.07 (0.89–1.27) |
| 4 | 0.84 (0.70–1.01) | 0.84 (0.70–1.00) | 0.88 (0.72–1.08) | 0.81 (0.66–1.01) | 0.84 (0.68–1.05) | 0.84 (0.68–1.04) |

\*p<0.05; \*\*p<0.01; \*\*\*p<0.001. a – number of psychosocial job adversities.
